1 **Dynamics of microbial community composition and soil organic carbon mineralization in**  
2 **soil following addition of pyrogenic and fresh organic matter**

3 Thea Whitman<sup>a,b\*</sup>, Charles Pepe-Ranne<sup>a</sup>, Akio Enders<sup>a</sup>, Chantal Koechli<sup>a</sup>, Ashley Campbell<sup>a</sup>,  
4 Daniel H. Buckley<sup>a</sup>, Johannes Lehmann<sup>a,c</sup>

5 a. School of Integrative Plant Science, Cornell University, Ithaca, NY

6 b. Department of Soil Science, University of Wisconsin-Madison, Madison, WI

7 c. Atkinson Center for a Sustainable Future, Cornell University, Ithaca, NY

8 \* Corresponding author: [twhitman@wisc.edu](mailto:twhitman@wisc.edu)

9

10 **Abstract**

11 Pyrogenic organic matter (PyOM) additions to soils can have large impacts on soil organic C  
12 (SOC) cycling. Because the soil microbial community drives SOC fluxes, understanding how  
13 PyOM additions affect soil microbes is essential to understanding how PyOM affects SOC. We  
14 studied SOC dynamics and surveyed soil microbial communities after OM additions in a field  
15 experiment. We produced and applied either 350°C corn stover PyOM or an equivalent amount  
16 of dried corn stover to a Typic Fragiudept soil. Stover increased SOC-derived and total CO<sub>2</sub>  
17 fluxes (up to 6x), and caused rapid and persistent changes in bacterial community composition  
18 over 82 days. In contrast, PyOM only temporarily increased total soil CO<sub>2</sub> fluxes (up to 2x) and  
19 caused fewer changes in bacterial community composition. 70% of the OTUs that increased in  
20 response to PyOM additions also responded to stover additions. These OTUs likely thrive on  
21 easily-mineralizable C that is found both in stover and, to a lesser extent, in PyOM. In contrast,

22 we also identified unique PyOM-responders, which may respond to substrates such as  
23 polyaromatic C. In particular, members of *Gemmatimonadetes* tended to increase in relative  
24 abundance in response to PyOM but not to fresh organic matter. We identify taxa to target for  
25 future investigations of the mechanistic underpinnings of ecological phenomena associated with  
26 PyOM additions to soil.

27

## 28 **1 Introduction**

29

30 Large inputs of pyrogenic organic matter (PyOM) in fire-affected ecosystems can constitute up  
31 to 80% of total soil organic carbon (SOC) (Lehmann *et al.*, 2008). Whether PyOM is produced  
32 naturally in fires (Czimczik and Masiello, 2007), intentionally for carbon (C) management,  
33 and/or as an agricultural amendment (Lehmann, 2007; Laird, 2008), it is important to understand  
34 how it affects the C cycle (Whitman *et al.*, 2010). PyOM additions to soil can significantly affect  
35 plant growth and crop yields (*e.g.*, Jeffery *et al.*, 2011) and SOC dynamics (Watzinger *et al.*,  
36 2014; Maestrini *et al.*, 2014; Whitman *et al.*, 2015). For example, among other effects, PyOM  
37 can change soil pH (Gul *et al.*, 2015), add nutrients to soils (Enders *et al.*, 2012), and alter soil  
38 water-holding capacity (Abel *et al.*, 2013). While PyOM additions to soils can alter inorganic C  
39 dynamics through changes to soil pH, a key mechanism for changes in SOC mineralization is  
40 altered microbial mineralization of SOC in response to PyOM (Maestrini *et al.*, 2014; Whitman  
41 *et al.*, 2015). Hence, an understanding of the effects of PyOM on the soil microbial community is  
42 required to understand the effects of PyOM on SOC stocks.

43

44 There are many ways PyOM could affect soil microorganisms (Kuzyakov and Bol, 2004;  
45 Lehmann *et al.*, 2011; Ameloot *et al.*, 2013), including, but not limited to, microbial use of  
46 PyOM as a source of energy or nutrients, changes in soil physical or chemical characteristics  
47 (*e.g.*, pH), impacts on plant growth, and interference with microbial signaling (Masiello *et al.*,  
48 2013). Recent research has only begun to identify PyOM effects on soil microbial communities,  
49 and it is clear that PyOM additions to soil can induce changes in soil microbial community  
50 composition. Most current evidence has been gathered using fingerprinting approaches, such as  
51 T-RFLP (Bingeman *et al.*, 1953; Jin, 2010; Kolton *et al.*, 2011) or DGGE (Kolton *et al.*, 2011;  
52 Chen *et al.*, 2013), or by surveying PLFAs to assess microbial diversity at low phylogenetic  
53 resolution (Dunavin, 1969; Jindo *et al.*, 2012; Gomez *et al.*, 2014; Watzinger *et al.*, 2014;  
54 Mitchell *et al.*, 2015). In addition, some high-throughput DNA sequencing approaches have been  
55 applied to survey microorganisms in PyOM systems. For example, significant differences were  
56 found between soil bacterial communities in Amazonian Dark Earth soils (amended with PyOM  
57 thousands of years ago), PyOM isolated from the Amazonian Dark Earth soils, and adjacent  
58 unamended Acrisols, by surveying SSU rRNA genes (Taketani *et al.*, 2013). A handful of other  
59 studies have used high-throughput sequencing approaches to characterize PyOM effects on soil  
60 microbial communities (*e.g.*, Nielsen *et al.*, 2014; Xu *et al.*, 2014). However, due to the low  
61 number of studies and the wide diversity of PyOM materials, addition rates, soils, and  
62 environmental conditions, it is difficult to draw generalizable conclusions about the effects of  
63 PyOM on soil microbial communities, particularly at the level of individual taxa.

64

65 In this study, we investigated the effects of PyOM additions on SOC mineralization and soil  
66 microbial community composition in a field setting over 12 weeks. We also included a treatment

67 where plots received a mass of fresh corn stover equivalent to the mass required to produce the  
68 PyOM we added. This treatment serves as a system-level control that addresses the question,  
69 “What if a given amount of biomass were not used to produce PyOM, but were applied directly  
70 to the soil?” We predicted that there would be significant differences in C dynamics between the  
71 two systems, with fresh biomass decomposing faster, and having a greater effect on SOC  
72 mineralization. Additionally, we predicted that the addition of fresh biomass would induce the  
73 greatest changes in the microbial community, with organisms that access easily-mineralizable C  
74 sources proliferating initially, and the organisms that are able to decompose aromatic or  
75 insoluble substrates, such as lignin or cellulose, emerging later. We expected that the majority of  
76 the micro-organisms that increase in relative abundance in response to PyOM additions will also  
77 increase in response to fresh organic matter additions, but they will respond to PyOM to a  
78 smaller degree, since a smaller fraction of the PyOM-C is easily-mineralizable.

79

## 80 **2 Materials and methods**

81

### 82 *2.1 Experimental design*

83

84 We conducted a field trial, with soil left unamended, soil amended with <sup>13</sup>C-labelled 350°C corn  
85 stover (*Zea mays* (L.)) PyOM, or soil amended with fresh corn stover additions (Supplementary  
86 Tables 1 and 2). The <sup>13</sup>C label allowed for the C sources to be partitioned between SOC and  
87 PyOM-C or corn stover-derived C (Whitman and Lehmann, 2015). The corn stover addition was

88 designed so that the dried original corn biomass was equivalent to that which would have been  
89 required to produce the mass of corn PyOM that was applied to each plot. (*I.e.*, 4.1 Mg ha<sup>-1</sup> corn-  
90 derived PyOM were applied, which, with 0.365 mass fraction conserved during PyOM  
91 production, translates into 11.2 Mg ha<sup>-1</sup> corn stover, which is representative of a productive corn  
92 crop in the US (Shinners and Binversie, 2007)).

93

94 The field site is located in Cornell's research fields in Mt. Pleasant, N.Y., and is a Mardin soil  
95 (Coarse-loamy, mixed, active, mesic Typic Fragiudept) (Supplementary Table 2). The soil has  
96 been historically planted to a potato, rye, clover rotation, for the past > 30 years, but was kept in  
97 rye-clover rotation for the past 5 years, with one planting of sudangrass 3 years ago. The plot  
98 was sprayed with Roundup (glyphosate) herbicide in the fall of 2012, ploughed on May 3, 2013,  
99 and kept weed-free by hand-weeding and water-permeable landscape fabric through the summer  
100 until trial initiation.

101

102 The trial initiation date was August 16, 2013 (Day 0). Square plots (0.7 m x 0.7 m for the soil-  
103 only and PyOM, 0.45 m x 0.45 m for the stover) were surrounded by 0.7-m wide weed-free  
104 borders, maintained by hand weeding. Treatments were organized using a spatially balanced  
105 complete block design with 16 replicates of the unamended and PyOM plots, and 8 replicates of  
106 the stover plots (van Es *et al.*, 2007). Soil (6.1 kg) was removed from the surface of each plot,  
107 combined with stover or PyOM additions, if needed, and mixed in a V-mixer (Twin shell dry  
108 blender, Patterson-Kelley, East Stroudsburg, PA, USA). Amended plots received 4.1 Mg ha<sup>-1</sup> of  
109 PyOM or 11.2 Mg ha<sup>-1</sup> of dried original corn stover. After mixing, soils were returned to their

110 respective plots and evenly spread at the surface. Soil was gently tamped down using a flat piece  
111 of plywood. Two soil respiration collars made from 194 mm diameter white polyvinylchloride  
112 pipes were installed directly adjacent to each other at the centre of each plot with the collar  
113 protruding 30 mm and reaching 30 mm into the ground. Plots, including soil collars, were  
114 covered with water-permeable landscape fabric except during measurement for the first 2 weeks,  
115 after which fabric was removed and plots were kept weed-free by hand-weeding multiple times a  
116 week. The plots were not fertilized or watered during the trial, but were exposed to natural  
117 rainfall (temperature and precipitation are plotted in Supplementary Figure 1).

118

## 119 *2.2 Biomass production*

120

121 Two sets of corn plants (*Zea mays* (L.)) were grown, one in an enriched  $^{13}\text{CO}_2$  atmosphere  
122 growth chamber and the other in an ambient  $^{13}\text{CO}_2$  greenhouse. The labeled plants were grown in  
123 potting mix in a Percival AR-100L3  $\text{CO}_2$ -controlled growth chamber (Percival, Perry, IA). The  
124 plants were exposed to cycles of 18 h light / 6 h darkness. During light cycles, the atmosphere  
125 was maintained at 400 ppm  $\text{CO}_2$ . During the dark cycle,  $\text{CO}_2$  was allowed to accumulate through  
126 respiration, and was then drawn down by photosynthesis during the next light cycle. This was  
127 done in order to reduce net respiratory losses of labeled  $^{13}\text{CO}_2$ . Plants were pulse-labeled with 13  
128 L of 99%  $^{13}\text{CO}_2$  at regular intervals over the course of their growth in order to produce an even  
129 label. Pulse labels were delivered by opening the  $^{13}\text{CO}_2$  cylinder to fill a balloon with ~500 mL  
130  $^{13}\text{CO}_2$ . The balloon remained attached to the cylinder so that the  $^{13}\text{CO}_2$  slowly diffused out of the  
131 balloon, delivering the pulse at a rate so that the total atmospheric concentration of  $\text{CO}_2$  was not

132 affected. Plants in the growth chambers and the greenhouse were harvested just before they  
133 reached reproductive maturity and were oven-dried at 70°C.

134

### 135 *2.3 PyOM production and amendment mixing*

136

137 Oven-dried corn plants were ground in a hammer mill (Viking) to < 2 mm. The milled corn was  
138 pyrolyzed in a modified Fisher Scientific Isotemp programmable muffle furnace (Thermo Fisher  
139 Scientific, Waltham, MA, USA) (described in detail in Güereña *et al.* 2015) by ramping at 5°C  
140 min<sup>-1</sup> to 350°C, then holding at 350°C for 45 minutes, under Ar (Supplementary Table 1). The  
141 <sup>13</sup>C-labeled and natural abundance corn PyOM materials were mixed together to produce a δ<sup>13</sup>C  
142 value of +37.5‰. For the corn biomass-only plots, mixtures of <sup>13</sup>C-labeled and natural  
143 abundance corn with a δ<sup>13</sup>C value of +1.7‰ were created. Mixing was done in plot-level batches  
144 to ensure that each plot received exactly these proportions of labeled and unlabeled materials.

145

### 146 *2.4 CO<sub>2</sub> flux and <sup>13</sup>CO<sub>2</sub> measurements*

147

148 Soil CO<sub>2</sub> flux was measured using a LI-6400XT infra-red gas analyser with a 6400-09 soil CO<sub>2</sub>  
149 flux chamber attachment (LI-COR, Lincoln, Nebraska). Three flux measurements were taken in  
150 succession for each plot and averaged. Measurements were taken on days 0, 1, 2, 3, 4, 5, 6, 7, 9,  
151 11, 12, 14, 16, 18, 26, 30, 34, 38, 41, 45, 49, 53, 57, 62, 66, 74, and 81. Additional gas samples  
152 were taken for <sup>13</sup>CO<sub>2</sub> analysis and emissions partitioning on day 12 and on day 66 using

153 modified static Iso-FD chambers (Nickerson *et al.*, 2013; Whitman and Lehmann, 2015)  
154 (Supplementary Figure 2).

155

## 156 *2.5 Soil sampling*

157

158 Soil samples for microbial community analyses were taken on days 1, 12 (chosen because it was  
159 after the first major rainfall; Supplementary Figure 1), and 82. Samples were sieved to < 2 mm,  
160 and immediately frozen in Whirl-Paks in liquid N<sub>2</sub> and stored at -80°C. On days 1 and 12, two  
161 25-mm deep soil probe samples were pooled, while on day 82, soil within the entire collar was  
162 destructively sampled.

163

## 164 *2.6 Isotopic partitioning of CO<sub>2</sub> samples*

165

166 We partitioned the total CO<sub>2</sub> fluxes between SOC and stover or PyOM-C on days 12 and 66. To  
167 determine the relative contributions of SOC and added C (either PyOM or corn stover) to soil  
168 CO<sub>2</sub> fluxes, a standard isotope partitioning approach was applied (Balesdent and Mariotti, 1996).  
169 For example, for the plots with PyOM additions, the isotopic signature of the total emissions will  
170 be:

$$171 \quad (1) \delta_T = f_S * \delta_S + f_{PyOM} * \delta_{PyOM},$$



172 where  $\delta$  represents the  $^{13}\text{C}$  signature of  $\text{CO}_2$  from total  $\text{CO}_2$  ( $\delta_T$ ), soil alone ( $\delta_S$ ), or PyOM  
173 ( $\delta_{PyOM}$ ), and  $f_S$  and  $f_{PyOM}$  represent the fraction of total emissions made up by soil and PyOM,  
174 respectively (Werth and Kuzyakov, 2010). Since  $\delta_T$ ,  $\delta_S$ , and  $\delta_{PyOM}$  were all measured, and we  
175 know

176 
$$(2) f_S + f_{PyOM} = 1,$$

177 we can solve this system of two equations for the two unknown values,  $f_S + f_{PyOM}$ .

178

## 179 *2.7 Data processing and statistical analyses for CO<sub>2</sub> fluxes*

180

181 On rare occasions toward the end of the trial, we recorded negative  $\text{CO}_2$  fluxes, which we  
182 interpret as experimental error due to low flux rates, and have excluded these values from  
183 analyses. In addition, we excluded two data points where recorded fluxes were 56 and 16 SD  
184 away from the mean of the remaining plots. All statistical analyses were performed in R (R Core  
185 Team, 2015).  $\text{CO}_2$  fluxes were evaluated using a linear mixed effects model, with amendment,  
186 day, interaction between amendment and day, and plot ID (a repeated measures approach) as  
187 factors, using the R package “lme4” (Bates *et al.*, 2014). To make post-hoc comparisons, we  
188 performed pairwise comparisons between the different soil amendments for a given day with a  
189 Tukey adjustment of  $p$ -values, using the “lsmeans” R package (Lenth, 2014).

190

## 191 *2.8 Microbial community analyses*

192

193 DNA was extracted from 0.25 g moist soil samples using the MoBio PowerLyzer PowerSoil kit,  
194 following the kit's directions. The DNA was quantified using the Quant-iT PicoGreen dsDNA  
195 Assay Kit (Life Technologies) with a multimode microplate reader (Molecular Devices,  
196 Sunnyvale, CA). DNA yields were normalized on the basis of grams of dry soil extracted. SSU  
197 rRNA genes were PCR amplified in triplicate for each sample. PCR was conducted with 12.5  $\mu$ L  
198 Q5 Hot Start High Fidelity 2X mastermix (New England Biolabs), 5  $\mu$ L of DNA template  
199 diluted with water at a ratio of 1:50, 5  $\mu$ L water, and 2.5  $\mu$ L primer mixtures to a total volume of  
200 25  $\mu$ L. Each PCR consisted of a 98°C hold for 30s, followed by 30 cycles of [5s at 98°C, 20s at  
201 20°C, and 10s at 72°C], with a final extension for 2min at 72°C. Modified 515F and 907R  
202 primers (Supplementary Tables 3 and 4) were used to target the V4/V5 regions of the 16S  
203 ribosomal RNA gene. Unique barcodes were added to the primers used for each sample so that  
204 the SSU rRNA sequences from each sample could be demultiplexed post-sequencing  
205 (Supplementary Tables 3 and 4). Each PCR product was run on a 0.5% agarose gel, along with  
206 the negative control, to determine whether amplification was successful. Replicate PCR products  
207 were pooled, and DNA concentrations were normalized across all samples using SequalPrep  
208 normalization plates (Applied Biosystems). The pooled sample was purified using a Wizard SV  
209 Gel and PCR Clean-Up System (Promega). This sample was submitted with sequencing primers  
210 (Supplementary Table 5) for paired ends 2 x 300 bp sequencing on the Illumina MiSeq v3  
211 platform at Cornell's Biotech Core Facility.

212

213 *2.9 Microbial community bioinformatics*

214

215 *2.9.1 Paired read merging, demultiplexing, and quality control*

216

217 We merged the forward and reverse reads using the Paired End reAd mergeR (PEAR) (Flouri  
218 and Zhang, 2013) and demultiplexed them by barcode. DNA sequences were managed using  
219 screed databases (Nolley and Brown, 2012).

220

221 We removed merged reads with more than one expected error using USEARCH (Edgar, 2013).  
222 We also removed any sequences that had ambiguous base calls. We further identified erroneous  
223 sequences with alignment based quality control (Schloss *et al.*, 2009), by aligning our sequences  
224 to the SILVA Reference Alignment as provided by the Mothur developers and removing reads  
225 that did not align to the expected region of the SSU rRNA gene. We then removed any sequences  
226 that were less than 370 bp or more than 376 bp long or had homopolymers (runs of the same  
227 base in a row) more than 8 nucleotides in length. Quality control removed 6 265 604 reads,  
228 leaving 10 237 689 high quality sequences. With 3 treatments, two with 16 replicates and one  
229 with 8 replicates, and 3 time-points, we had a total of 120 samples. Individual samples contained  
230 from 8 830 to 194 356 total sequences, with a mean of  $69\,419 \pm 44\,070$ .

231

232 *2.9.2 Operational taxonomic unit (OTU) picking*

233

234 Reads were clustered into OTUs using the UPARSE methodology (Edgar, 2013) with an OTU  
235 sequence identity cut-off of 97%. In the UPARSE workflow, chimeras are detected and  
236 discarded when OTU centroids are selected. Of the quality-controlled reads, 81% could be  
237 mapped to OTU centroids. We taxonomically annotated OTU centroids using the “uclust” based  
238 taxonomic annotation framework in QIIME (v1.8) with default parameters (Caporaso *et al.*,  
239 2010; Edgar, 2013). OTUs annotated as “*Archaea*”, “*mitochondria*”, or “*Eukarya*” were removed  
240 in downstream analyses. One sample (an unamended plot from day 82) was left with only 8  
241 sequences, so it was excluded from further analyses.

242

### 243 *2.9.3 Community analysis*

244

245 OTU centroids were taxonomically annotated within the Greengenes taxonomic nomenclature  
246 using the “uclust” taxonomic annotation framework in QIIME with default parameters (Caporaso  
247 *et al.*, 2010). Centroids from 97% sequence identity clusters of Greengenes database SSU rRNA  
248 gene sequences (version 13\_8) and corresponding annotations were used as reference for  
249 taxonomic annotation. We used the R package “vegan” (Oksanen *et al.*, 2015) to perform a  
250 nonmetric multidimensional scaling (NMDS) analysis on the weighted UniFrac distance between  
251 communities across all timepoints and amendments (Lozupone *et al.*, 2011). Weighted UniFrac  
252 accounts for the relative abundance of each OTU, not just considering its presence/absence. We  
253 then tested whether there were significant effects on the microbial community due to amendment  
254 types and day of sampling with a nonparametric multivariate analysis of variance  
255 (NPMANOVA) on weighted UniFrac distances, using the “adonis” function from the R package

256 “vegan” (Oksanen *et al.*, 2015). Because we found day and amendment both had significant  
257 effects ( $p < 0.001$ ), we performed a separate weighted UniFrac analysis and NPMANOVA for  
258 each day and amendment type (comparing each amendment to either each other or to no  
259 additions, for each day), adjusting  $p$ -values using a Bonferroni correction for 6 comparisons ( $p_{adj}$   
260  $= p * 6$ ).

261

262 We used the R package “DESeq2” (Love *et al.*, 2014) to calculate the differential abundance  
263 ( $\log_2$ -fold change in relative abundance of each OTU) for each amendment type as compared to  
264 the unamended plots for both sampling days (McMurdie and Holmes, 2014). We independently  
265 filtered out OTUs that were sparsely represented across samples (*i.e.*, those OTUs for which the  
266 DESeq2-normalized count across samples (“baseMean”) was less than 0.6). Sparse OTUs will  
267 not contain sufficient sequence counts to provide statistically significant results and their  
268 removal reduces the number of multiple comparisons performed, thereby mitigating problems  
269 associated with multiple comparisons to some extent. We adjusted the  $p$ -values with the  
270 Benjamini and Hochberg (BH) correction method and selected a study-wide false discovery rate  
271 (FDR) of 10% to denote statistical significance (Love *et al.*, 2014). We defined “responding  
272 OTUs” as OTUs with a differential abundance greater than 1 and an adjusted  $p$ -value of  $<0.1$ .  
273 We performed a BLAST (nucleotide blast, version 2.2.29+, default parameters) search with OTU  
274 centroid sequences of responding OTUs, against the Living Tree Project (LTP) database (version  
275 115) (Yarza 2008). The LTP database contains 16S rRNA gene sequences for all sequenced  
276 archaeal and bacterial type strains.

277

## 278 **3 Results**

279

### 280 *3.1 Soil C dynamics*

281

282 Total CO<sub>2</sub> fluxes from plots that received uncharred stover additions were significantly (mixed  
283 model repeated measures design, Tukey-adjusted post-hoc comparisons,  $p < 0.05$ ) higher than all  
284 other plots for the first 26 days and for 19 of the 27 days for which fluxes were determined  
285 (Figure 1). Stover additions had the greatest effects on CO<sub>2</sub> fluxes (CO<sub>2</sub> fluxes 6 times those of  
286 unamended soils) on days 7 and 11, after strong rain events (Supplementary Figure 1). Plots with  
287 PyOM additions experienced significantly higher CO<sub>2</sub> fluxes than plots with no additions for the  
288 first 12 days, after which there were no significant differences (Figure 1). The increases in fluxes  
289 with PyOM additions were much less dramatic than those in the stover-amended plots, and were  
290 never greater than 2.1 times the CO<sub>2</sub> emissions from unamended soils.

291

292 On day 12, <sup>13</sup>C partitioning revealed that corn stover additions significantly increased SOC-  
293 derived CO<sub>2</sub> fluxes as compared to soils with no additions, but PyOM additions did not  
294 (Supplementary Figure 3). On day 66, there were no significant differences in SOC-derived CO<sub>2</sub>  
295 fluxes between all soils, and overall fluxes were much lower on this date (Figure 1 and  
296 Supplementary Figure 3).

297

### 298 *3.2 Microbial Community Analyses*

299

300 There were significant changes in the microbial community composition over time  
301 (NPMANOVA,  $p < 0.006$ ,  $R^2=0.19$ ) and with amendment type (NPMANOVA,  $p < 0.006$ ,  
302  $R^2=0.20$ ) (Figure 2). Microbial community composition in unamended plots remained relatively  
303 consistent over time (NPMANOVAs comparing Day 1 to Day 12 [ $p < 0.06$ ,  $R^2 = 0.18$ ] and to  
304 Day 82 [ $p < 0.29$ ,  $R^2 = 0.11$ ]), while PyOM-amended plots varied slightly and corn stover-  
305 amended plots varied greatly over time (Figure 2). The different treatments were not observed to  
306 alter microbial community composition on day 1 (only 24 hours after OM additions). By day 12,  
307 the stover treatment caused a significant change in community composition (NPMANOVA,  $p <$   
308  $0.006$ ,  $R^2=0.75$ ), though no effect of PyOM was observed. By day 82, the microbial communities  
309 in the PyOM-amended plots (NPMANOVA,  $p < 0.02$ ,  $R^2=0.19$ ) and corn stover-amended plots  
310 (NPMANOVA,  $p < 0.02$ ,  $R^2=0.56$ ) were both distinct from the unamended plots and from each  
311 other (NPMANOVA,  $p < 0.01$ ,  $R^2 = 0.36$ ). We did not detect significant differences in DNA  
312 yield due to the addition of PyOM or stover directly after amendment additions (day 1), but  
313 DNA yield was significantly higher in plots with stover additions on days 12 and 82  
314 (Supplementary Table 6).

315

316 The stover treatment caused multiple phyla to change significantly in relative abundance as  
317 compared to control plots on days 12 and 82 (Figure 3). In contrast, PyOM additions only led to  
318 a significant change in the relative abundance of the phyla *Armatimonadetes* (decreased), and  
319 *Bacteroidetes* (increased) and only on day 82 (Figure 3). However, we caution that decreases in  
320 relative abundance do not necessarily correspond to decreases in absolute abundance – rather,

321 they could result from an increase in the absolute abundance of other phyla. It is notable that  
322 extracted DNA increased significantly in response to stover additions on Days 12 and 82  
323 (Supplementary Table 6; ANOVA and Tukey's HSD,  $p < 0.05$ ). Since total DNA is correlated  
324 with microbial biomass (Anderson and Martens, 2013; Fornasier *et al.*, 2014; Gagneux *et al.*,  
325 2011, but see Leckie *et al.*, 2004), this result likely indicates an increase in microbial biomass in  
326 association with stover additions. Hence, we transformed the relative abundance data from stover  
327 treatments by scaling by the mass of extracted DNA per soil sample and performing the t-tests on  
328 those scaled values (Supplementary Note 1). The results obtained with scaled data matched those  
329 obtained with unscaled data, except declines in relative abundance for *Acidobacteria* and  
330 *Gemmatimonadetes* on day 82 were no longer statistically significant when scaled for the change  
331 in absolute DNA abundance in the stover treatment.

332  
333 Many OTUs, from several phyla, responded significantly to stover and/or PyOM additions  
334 (Figure 4; Supplementary Tables 7 and 8; Supplementary Figures 6-14). We use the term  
335 'responders' to refer specifically to those OTUs that increase significantly in relative abundance  
336 by more than doubling in response to stover and/or PyOM additions as compared to  
337 corresponding plots that did not receive amendments. We identified 806 responders to either  
338 stover and/or PyOM from among the 7 770 total OTUs observed across all soil samples. There  
339 were more responders to stover (677 OTUs) than to PyOM (264 OTUs) (Figures 2, 4, and 5). A  
340 total of 8% of all OTUs responded specifically to stover (Figure 5, blue region), 2% responded  
341 specifically to PyOM (Figure 5, pink region), and 2% responded to both PyOM and stover  
342 (Figure 5, purple region and Supplementary Figures 4 and 5). The total number of responders to  
343 both stover and PyOM increased over time and nearly all phyla had more OTUs respond at day



344 82 than day 12. The only notable exception is *Firmicutes*, which had more stover responders at  
345 day 12 (36 OTUs) than day 82 (11 OTUs), and which only had 1 OTU that responded to PyOM  
346 (Supplementary Figure 6).

347

348 Many OTUs from *Firmicutes*, *Proteobacteria*, and *Bacteroidetes* responded to stover additions  
349 (Figures 4 and 5; Supplementary Figures 6, 7, and 8). Among *Proteobacteria*, 125 OTUs  
350 responded to stover additions on day 12, increasing to 235 responders on day 82 (primarily  
351 OTUs from the orders *Rhizobiales*, *Burkholderiales*, *Sphingomonadales*, *Xanthomonadales*, and  
352 *Pseudomonadales* on both days, and *Rhodospirillales* and *Myxococcales* on day 82)  
353 (Supplementary Figure 7). Among *Bacteroidetes*, 60 OTUs responded to stover additions on day  
354 12, increasing to 128 on day 82 (primarily orders *Saprospirales*, *Cytophagales*, and  
355 *Sphingobacteriales*, on both days and *Flavobacteriales* on day 12) (Supplementary Figure 8). In  
356 *Firmicutes*, 36 OTUs responded to stover on day 12, declining to 11 OTUs by day 82 (orders  
357 *Bacillales* and *Clostridiales* at both times) (Supplementary Figure 6).

358

359 Only 19 OTUs were observed to respond to both stover and PyOM at day 12, but this increased  
360 to 113 OTUs by day 82. The OTUs that responded to both stover and PyOM included  
361 *Proteobacteria* (66 OTUs; Supplementary Figure 7), *Bacteroidetes* (24 OTUs; Supplementary  
362 Figure 8), and *Verrucomicrobia* (11 OTUs; Supplementary Figure 9). In particular, a number of  
363 OTUs from *Verrucomicrobia* were observed to increase greatly in relative abundance in response  
364 to both stover and PyOM as compared to untreated control plots (Figure 6 and Supplementary  
365 Figures 9 and 15).

366

367 Only 12 OTUs increased in relative abundance specifically in response to PyOM at day 12, but  
368 this increased to 138 OTUs by day 82. The OTUs that responded specifically to PyOM included  
369 *Proteobacteria* (47 OTUs; Supplementary Figure 7), *Bacteroidetes* (30 OTUs; Supplementary  
370 Figure 8), *Planctomycetes* (13 OTUs; Supplementary Figure 10), *Gemmatimonadetes* (12 OTUs;  
371 Supplementary Figure 11), and *Verrucomicrobia* (6 OTUs; Supplementary Figure 9). The  
372 strongest specific response to PyOM and not stover, by far, was observed for OTUs from  
373 *Gemmatimonadetes* (Figure 5). These included OTUs from the orders *Gemmatimonadales* and  
374 “Ellin5290” (Figure 6 and Supplementary Figure 16). Two of these *Gemmatimonadetes* OTUs  
375 were also among the top 10 most abundant PyOM responders. The most abundant PyOM  
376 responders also included two OTUs from *Bacteroidetes* (from the *Oxalobacteraceae*), and two  
377 OTUs from *Proteobacteria* (*Rhizobiales* and *Erythrobacteraceae*).

378

## 379 **4 Discussion**

380

### 381 *4.1 Soil microbial community dynamics*

382

383 The soils that received corn stover amendments showed dramatic increases in CO<sub>2</sub> emissions  
384 almost immediately (Figure 1), and microbial community composition in those plots had  
385 changed significantly by day 12 (Figures 2 and 3). Stover additions resulted in significant  
386 increases in the relative abundance of OTUs from the phyla *Proteobacteria* and *Bacteroidetes*,

387 and the orders *Actinomycetales*, *Bacillales*, and *Clostridiales* (Figures 3 and 4), which is  
388 consistent with previous studies (Pascault *et al.*, 2013). For example, wheat residue additions to a  
389 calcareous silty clay farm soil stimulated *Firmicutes* OTUs, while alfalfa additions stimulated  
390 *Proteobacteria*, *Firmicutes*, and *Bacteroidetes* (Pascault *et al.*, 2013). It is possible that these  
391 microorganisms are adapted to grow rapidly in response to inputs of easily-mineralizable organic  
392 matter (*e.g.*, aliphatic C structures). These early-responding OTUs are likely responsible for the  
393 strong increase in total soil CO<sub>2</sub> emissions during the first weeks after stover was applied (Figure  
394 1). Since corn stover is more easily-mineralizable than pre-existing SOC, its addition might be  
395 predicted to stimulate a broad spectrum of microorganisms. However, corn stover additions  
396 stimulated only a narrow subset of microorganisms (~10% of OTUs).

397

398 Although the greatest effect of amendments on CO<sub>2</sub> emissions took place within the first two  
399 weeks (Figure 1), the microbial community response to organic amendments grew stronger over  
400 82 days. The number of PyOM responders increased 11.5-fold from day 12 to day 82, while the  
401 number of stover responders only increased 1.6-fold during this timeframe. A total of 70% of the  
402 PyOM responders that were observed by day 12 also responded to stover (Figure 5,  
403 Supplementary Figure 4). These early PyOM responders likely represent those microorganisms  
404 responsible for short-term mineralization of PyOM-C and for the CO<sub>2</sub> emissions we observed  
405 within the first two weeks (although we note that this abundance-based approach would not  
406 detect possible changes to the contributions to CO<sub>2</sub> efflux from microbes that did not actively  
407 grow/divide during the study (Blazewicz *et al.*, 2013)). The fact that 70% of these rapidly  
408 responding PyOM responders also responded to stover suggests that they are likely metabolizing  
409 easily-mineralizable, possibly aliphatic components of PyOM which are also present within fresh

410 corn stover (Cheng *et al.*, 2008). In contrast, the OTUs that responded to both PyOM and stover  
411 on day 82 may represent microbes that were accessing the polyaromatic bulk of the PyOM-C and  
412 the remaining, less easily-mineralizable stover-C compounds (Whitman *et al.*, 2013). In addition,  
413 late-responding OTUs could include microbes that are responding to other effects of the  
414 amendments, such as changes in soil physical or chemical properties, or the ecology of the  
415 system (*e.g.*, changes to the soil food web, competition, or mutualisms).

416

#### 417 *4.2 PyOM effects on the soil microbial community*

418

419 The OTUs that responded uniquely to PyOM include representatives from 14 phyla (Figure 5,  
420 pink region and Supplementary Figures 4-14). While the short-term effects of PyOM on SOC  
421 dynamics may be driven to a large extent by a relatively small, but easily-mineralizable fraction  
422 of PyOM-C (Whitman *et al.*, 2014), it is essential to also understand the longer-term effects  
423 driven by chemical or physical changes to the soil environment, such as pH, soil moisture,  
424 nutrient status, or the mineralization of more chemically complex PyOM-C sources. For this, the  
425 *Gemmatimonadetes*, particularly those of classes *Gemm-5*, *Gemm-3*, and *Gemmatimonadales*,  
426 are a prime target (Figure 6 and Supplementary Figure 11 and 16). The first isolates of the  
427 *Gemmatimonadetes* phylum were described in 2003 (Zhang *et al.*, 2003), and while little is yet  
428 known about them ecologically and physiologically, our findings seem consistent with previous  
429 observations. For example, *Gemmatimonadetes* have been found to decrease in relative  
430 abundance with the addition of wheat residues (Bernard *et al.*, 2007), were more active in soil  
431 microcosms that did not receive leaf litter (Pfeiffer *et al.*, 2013), and were more likely to be

432 decomposing existing SOM than fresh OM (Pascault *et al.*, 2013). Of particular relevance,  
433 *Gemmatimonadetes* increased with the addition of rice straw PyOM made at 500°C to a farmed  
434 Acrisol in a pot trial (Xu *et al.*, 2014). This increase was driven by increases from the class  
435 *Gemmatimonadetes*, with some *Gemm1* and *Gemm3* increasing in relative abundance as well.  
436 These studies and our own findings suggest they may be adapted to a lifestyle associated with  
437 OM sources that are challenging to mineralize. Increased pH with PyOM additions may also  
438 have had a positive effect on *Gemmatimonadetes*, which have been reported to be more abundant  
439 in neutral pH soils (Lauber *et al.*, 2009; Vishnivetskaya *et al.*, 2011), although this effect was not  
440 significant for a much larger pH range than that observed in this study (2.6 vs. 0.75) (DeBruyn *et*  
441 *al.*, 2011). *Gemmatimonadetes* may also be adapted for low soil moisture (DeBruyn *et al.*, 2011),  
442 but this is not a likely explanation in our study, since we did not measure significant differences  
443 in soil moisture in the PyOM-amended soils on any sampling day (data not shown). The top 5  
444 most abundant OTUs that responded uniquely to PyOM, including members of the  
445 *Oxalobacteraceae*, *Rhizobiales*, and *Erythrobacteraceae*, could also be good targets for future  
446 investigations into microbial interactions with PyOM.

447

448 PyOM produced from different materials under different conditions can result in a wide range of  
449 pH values (Enders *et al.*, 2012), and in this study, PyOM additions significantly increased soil  
450 pH (Supplementary Figure 17), albeit by less than a full pH unit. Soil pH is strongly correlated  
451 with community composition (Lauber *et al.*, 2009; Rousk *et al.*, 2010). In particular, the aptly  
452 named phylum *Acidobacteria* has been shown to be especially sensitive to pH shifts, although its  
453 subgroups show variable responses to acidity: subgroups 1, 2, and 3 have been shown to increase  
454 at lower pHs, while subgroups 4, 5, 6, 7, and 17 have been shown to increase at higher pHs

455 (Rousk *et al.*, 2010; Bartram *et al.*, 2013). Both Bartram *et al.* (2013) and Rousk *et al.* (2010)  
456 characterized soils from long-term (50+ and 100+ years, respectively) liming trials, so it is not  
457 possible to predict from those studies the expected timescale of a soil microbial community  
458 response to pH changes. However, we may ask whether the PyOM-specific response in this  
459 study is driven by pH shifts. We found that OTUs from subgroup 4 did generally increase with  
460 PyOM additions (Supplementary Figure 18). However, we also found that members of subgroup  
461 6 decreased in relative abundance, while subgroup 3 increased with PyOM additions  
462 (Supplementary Figure 18), which is counter to what trends in previous studies would predict if  
463 these changes were being driven purely by the pH increase with PyOM additions. This does not  
464 necessarily contrast with the previous studies – rather, it may show that factors other than pH are  
465 likely important for driving the observed changes in subgroups 3 and 6 in this system.  
466 Explanations besides pH are particularly likely, as the pH shift by +0.75 units was small in  
467 comparison to the potential magnitude of natural pH gradients common in soils (*e.g.*, due to  
468 biological activity, rhizosphere effects, or wet-dry cycles (Husson, 2012)). *Acidobacteria* have  
469 sometimes been characterized as being poorly equipped to compete in high nutrient conditions  
470 (Fierer *et al.*, 2007). If some *Acidobacteria* are able to mineralize challenging C forms, such as  
471 fused aromatic C ring structures, but are poorly adapted for metabolizing easily-mineralizable C,  
472 for example, this could explain the positive response of OTUs in *Acidobacteria* subgroup 3 to  
473 PyOM additions on day 82, despite the accompanying small pH increase.

474

475 *4.3 Soil C dynamics*

476

477 Stover amendments had a larger effect than PyOM on both soil microbial community  
478 composition and also the mineralization of existing SOC. Stover additions significantly increased  
479 plot-level CO<sub>2</sub> emissions over a longer period of time (Figure 1), and also resulted in  
480 significantly greater SOC-derived CO<sub>2</sub> emissions on Day 12 (Supplementary Figure 3).  
481 However, this increase in mineralization of existing SOC disappeared by Day 66 (Supplementary  
482 Figure 3). These dynamics likely reflect the relative microbial accessibility or solubility of the  
483 two amendments (Lehmann and Kleber, 2015).

484

485 Because the PyOM was produced at a relatively low temperature (350°C), there was likely a  
486 substantial fraction of relatively easily-mineralizable C (Whitman *et al.*, 2013; Zimmerman,  
487 2010) that contributed to the increases in total CO<sub>2</sub> during the first week after application (Figure  
488 1 and Supplementary Figure 19). This fraction could include aliphatic C compounds, carboxylic  
489 acids, cellulose, and hemicellulose (Whitman *et al.*, 2013). (It is also possible that a small portion  
490 of the PyOM-C losses were due to the dissolution of carbonates (Supplementary Figure 17).)  
491 However, we did not find evidence that increased microbial activity due to PyOM additions  
492 affected SOC-derived CO<sub>2</sub> emissions (Supplementary Figure 3). This is likely because the  
493 PyOM-C was more challenging for microorganisms to mineralize than the stover-C, resulting in  
494 slower mineralization of PyOM as compared to the stover. While there was 1.8 times as much  
495 total stover-C added as PyOM-C, CO<sub>2</sub> emissions increased with stover additions much more than  
496 1.8 times the amount they increased with PyOM additions (Figure 1; Supplementary Figure 19).  
497 Only the stover provided a large easily-mineralizable C subsidy to the microbial community,  
498 which stimulated the microbial community, increased microbial biomass, and may have  
499 increased general enzymatic activity. This, in turn, increased mineralization of existing SOC

500 (Blagodatskaya and Kuzyakov, 2008). The lack of any detectable net effect on SOC  
501 mineralization from PyOM additions (often termed a “priming effect” (Bingeman *et al.*, 1953;  
502 Whitman *et al.*, 2014; Woolf and Lehmann, 2012)) is not unexpected. Specific combinations of  
503 PyOM materials and soils have been found to produce a wide range of effects on SOC  
504 mineralization (Whitman *et al.*, 2015; Maestrini *et al.*, 2014). The finding that PyOM application  
505 may result in less SOC loss than the application of an equivalent amount of fresh stover has  
506 implications for residue and C management at the farm scale. In systems where organic matter  
507 sources will rapidly mineralize under baseline conditions, PyOM production from this material  
508 and its return to the soil may result in greater net C gains than adding the fresh organic matter  
509 directly to the soil, due to the strong impact of fresh organic matter on the soil microbial  
510 community and their C mineralization activity.

511

## 512 **Acknowledgements**

513 We are grateful for the financial support by awards from the Towards Sustainability Foundation,  
514 Cornell Sigma Xi, NSERC PGS-D, NSF-BREAD (IOS-0965336), Cornell Biogeochemistry  
515 program, Cornell Crop and Soil Science Department, USDA-NIFA Carbon Cycle (2014-67003-  
516 22069), and the Cornell Atkinson Center for a Sustainable Future. Thanks to Nick Nickerson and  
517 Forerunner Research / EOSENSE for advice regarding chamber design. Thanks to Kelly Hanley,  
518 Joseph Amsili, Angela Possinger, Romy Zyngier, and Andy Cavin for help with fieldwork.  
519 Thanks also to Brent Whitman and Ellen Whitman for helping with lab analyses. Thanks to Dr.  
520 Christine Goodale for helpful discussion and suggestions. The authors declare no conflict of  
521 interest.



522

523 **Author contributions**

524 T.W., D.H.B., and J.L. designed the experiment, T.W. and A.E. grew the biomass and produced  
525 the PyOM, A.E. designed and built the CO<sub>2</sub> chambers, T.W. conducted the field trial, T.W.  
526 performed the biogeochemical lab work, A.C., C.K., and T.W. performed the molecular lab  
527 work, A.C., C.K., and C.P.-R. developed the bioinformatics analysis pipeline, T.W. and C.P.R.  
528 performed the bioinformatics analyses, T.W., C.P.-R., D.H.B., and J.L. interpreted the data, and  
529 T.W. wrote the manuscript, and all authors commented on the paper.

530

531 **Supplementary information**

532 Supplementary information is available at ISME J's website. All scripts used for microbial  
533 sequence data processing and analysis are openly available at  
534 <https://github.com/TheaWhitman/PyOM>. Sequence data are deposited in the NCBI Sequence  
535 Read Archive under accession number XXX.

536

537

## REFERENCES

- 538 Abel S, Peters A, Trinks S, Schonsky H, Facklam M. (2013). Impact of biochar and hydrochar  
539 addition on water retention and water repellency of sandy soil. *Geoderma* **202-203**: 183-191.
- 540 Ameloot N, Graber ER, Verheijen FGA, De Neve S. (2013). Interactions between biochar  
541 stability and soil organisms: review and research needs. *European Journal of Soil Science*  
542 **64**:379–390.
- 543 Anderson T-H, Martens R. (2013). DNA determinations during growth of soil microbial  
544 biomass. *Soil Biology and Biochemistry* **57**:487-495.
- 545 Balesdent J, Mariotti A. (1996). Measurement of soil organic matter turnover using <sup>13</sup>C natural  
546 abundance. In *Mass Spectrometry of Soils*, Boutton, TW & Yamasaki, SI (Eds.) Marcel Dekker,  
547 New York.
- 548 Bartram AK, Jiang X, Lynch MD, Masella AP, Nicol GW, Dushoff J, *et al.* (2013). Exploring  
549 links between pH and bacterial community composition in soils from the Craibstone  
550 Experimental Farm. *FEMS Microbiology Ecology* **87**: 403-415.
- 551 Bernard L, Mougél C, Maron P-A, Nowak V, Lévêque J, Henault C, *et al.* (2007). Dynamics and  
552 identification of soil microbial populations actively assimilating carbon from <sup>13</sup>C-labelled wheat  
553 residue as estimated by DNA- and RNA-SIP techniques. *Environ Microbiol* **9**:752–764.
- 554 Bingeman CW, Varner JE, Martin WP. (1953). The effect of the addition of organic materials on  
555 the decomposition of an organic soil. *Soil Science Society of America Journal* **17**:34–38.
- 556 Blagodatskaya E, Kuzyakov Y. (2008). Mechanisms of real and apparent priming effects and  
557 their dependence on soil microbial biomass and community structure: critical review. *Biology*  
558 *and Fertility of Soils* **45**:115–131.
- 559 Blazewicz SJ, Barnard RL, Daly RA, Firestone MK. (2013). Evaluating rRNA as an indicator of  
560 microbial activity in environmental communities: limitations and uses. *The ISME Journal*  
561 **7**:2061–2068.
- 562 Caporaso JG, Kuczynski J, Stombaugh J, Bittinger K, Bushman FD, Costello EK, *et al.* (2010).  
563 QIIME allows analysis of high-throughput community sequencing data. *Nature Methods* **7**:335–  
564 336.
- 565 Chen J, Liu X, Zheng J, Zhang B, Lu H, Chi Z, *et al.* (2013). Biochar soil amendment increased  
566 bacterial but decreased fungal gene abundance with shifts in community structure in a slightly  
567 acid rice paddy from Southwest China. *Applied Soil Ecology* **71**:33–44.

- 568 Cheng C-H, Lehmann J, Engelhard MH. (2008). Natural oxidation of black carbon in soils:  
569 Changes in molecular form and surface charge along a climosequence. *Geochimica Et*  
570 *Cosmochimica Acta* **72**:1598–1610.
- 571 Czimeczik CI, Masiello CA. (2007). Controls on black carbon storage in soils. *Global*  
572 *Biogeochemical Cycles* **21**:GB3005.
- 573 DeBruyn JM, Nixon LT, Fawaz MN, Johnson AM, Radosevich M. (2011). Global biogeography  
574 and quantitative seasonal dynamics of *Gemmatimonadetes* in soil. *Applied and Environmental*  
575 *Microbiology* **77**: 6295-6300.
- 576 Dunavin LS. (1969). A comparison of Gahi-1 millet and Grazer A sorghum x sudangrass at  
577 several pH levels. *Proceedings of the Soil and Crop Science Society of Florida* **29**: 163–168.
- 578 Edgar RC. (2013). UPARSE: highly accurate OTU sequences from microbial amplicon reads.  
579 *Nature Methods* **10**:996–998.
- 580 Enders A, Hanley K, Whitman T, Joseph S, Lehmann J. (2012). Characterization of biochars to  
581 evaluate recalcitrance and agronomic performance. *Bioresource Technology* **114**:644–653.
- 582 Fierer N, Bradford MA, Jackson RB. (2007). Toward an ecological classification of soil bacteria.  
583 *Ecology* **88**:1354–1364.
- 584 Fornasier F, Ascher J, Ceccherini MT, Tomat E, Pietramellara G. (2014) A simplified rapid, low-  
585 cost and versatile DNA-based assessment of soil microbial biomass. *Ecological Indicators*  
586 **45**:75-82.
- 587 Gagneux C, Akpa-Vinceslas M, Sauvage H, Desaire S, Houot S, Laval K. (2011) Fungal,  
588 bacterial and plant dsDNA contributes to soil total DNA extracted from silty soils under different  
589 farming practices: Relationships with chloroform-labile carbon. *Soil Biology and Biochemistry*  
590 **43**:431-437.
- 591 Gomez JD, Deneff K, Stewart CE, Zheng J, Cotrufo MF. (2014). Biochar addition rate influences  
592 soil microbial abundance and activity in temperate soils. *European Journal of Soil Science*  
593 **65**:28–39.
- 594 Gul S, Whalen JK, Thomas BW, Sachdeva V, Deng H. (2015). Physico-chemical properties and  
595 microbial responses in biochar-amended soils: Mechanisms and future directions. *Agriculture,*  
596 *Ecosystems and Environment* **206**:46–59.
- 597 Guereña DT, Lehmann J, Thies JE, Enders A, Karanja N, Neufeldt H. (2015) Partitioning the  
598 contributions of biochar properties to enhanced biological nitrogen fixation in common bean  
599 (*Phaseolus vulgaris*). *Biology and Fertility of Soils* **51**: 479-491.

- 600 Husson, O. (2012). Redox potential (Eh) and pH as drivers of soil/plant/microorganism systems:  
601 a transdisciplinary overview pointing to integrative opportunities for agronomy. *Plant and Soil*  
602 **362**:389-417.
- 603 Jeffery S, Verheijen FGA, van der Velde M, Bastos AC. (2011). A quantitative review of the  
604 effects of biochar application to soils on crop productivity using meta-analysis. *Agriculture,*  
605 *Ecosystems and Environment* **144**:175–187.
- 606 Jin H. (2010). Characterization of microbial life colonizing biochar and biochar-amended soils.  
607 *Ph.D. dissertation* Cornell University: Ithaca, NY.
- 608 Jindo K, Sanchez-Monedero MA, Hernández T, García C, Furukawa T, Matsumoto K, *et al.*  
609 (2012). Biochar influences the microbial community structure during manure composting with  
610 agricultural wastes. *Science of The Total Environment* **416**:476–481.
- 611 Kolton M, Meller Harel Y, Pasternak Z, Graber ER, Elad Y, Cytryn E. (2011). Impact of biochar  
612 application to soil on the root-associated bacterial community structure of fully developed  
613 greenhouse pepper plants. *Applied and Environmental Microbiology* **77**:4924–4930.
- 614 Kuzyakov Y, Bol R. (2004). Using natural <sup>13</sup>C abundances to differentiate between three CO<sub>2</sub>  
615 sources during incubation of a grassland soil amended with slurry and sugar. *Journal of Plant*  
616 *Nutrition and Soil Science* **167**:669–677.
- 617 Laird DA. (2008). The charcoal vision: A win–win–win scenario for simultaneously producing  
618 bioenergy, permanently sequestering carbon, while improving soil and water quality. *Agronomy*  
619 *Journal* **100**:178–181.
- 620 Lauber CL, Hamady M, Knight R, Fierer N. (2009). Pyrosequencing-based assessment of soil  
621 pH as a predictor of soil bacterial community structure at the continental scale. *Applied and*  
622 *Environmental Microbiology* **75**:5111–5120.
- 623 Leckie SE, Prescott CE, Grayston SJ, Neufeld JD, Mohn WW. (2004) Comparison of chloroform  
624 fumigation-extraction, phospholipid fatty acid, and DNA methods to determine microbial  
625 biomass in forest humus. *Soil Biology and Biochemistry* **36**:529-532.
- 626 Lehmann J. (2007). A handful of carbon. *Nature* **447**:143–144.
- 627 Lehmann J, Kleber M. (2015) The contentious nature of soil organic matter. *Nature* **528**:60-68.
- 628 Lehmann J, Rillig MC, Thies J, Masiello CA, Hockaday WC, Crowley D. (2011). Biochar  
629 effects on soil biota - A review. *Soil Biology and Biochemistry* **43**:1812–1836.
- 630 Lehmann J, Skjemstad J, Sohi S, Carter J, Barson M, Falloon P, *et al.* (2008). Australian

- 631 climate–carbon cycle feedback reduced by soil black carbon. *Nature Geoscience* **1**:832–835.
- 632 Lozupone C, Lladser ME, Knights D, Stombaugh J, Knight R. (2011). UniFrac: an effective  
633 distance metric for microbial community comparison. *The ISME Journal* **5**:169–172.
- 634 Maestrini B, Nannipieri P, Abiven S. (2014). A meta-analysis on pyrogenic organic matter  
635 induced priming effect. *GCB Bioenergy* **7**:577-590.
- 636 Major J, Lehmann J, Rondon M, Goodale C. (2010). Fate of soil-applied black carbon:  
637 downward migration, leaching and soil respiration. *Global Change Biology* **16**:1366–1379.
- 638 Masiello CA, Chen Y, Gao X, Liu S, Cheng H-Y, Bennett MR, *et al.* (2013). Biochar and  
639 microbial signaling: production conditions determine effects on microbial communication.  
640 *Environmental science & Technology* **47**:11496–11503.
- 641 McMurdie PJ and Holmes S. (2014) Waste not, want not: Why rarefying microbiome data is  
642 inadmissible. *PLoS Computational Biology* **10**:e1003531.
- 643 Mitchell PJ, Simpson AJ, Soong R, Simpson MJ. (2015). Shifts in microbial community and  
644 water-extractable organic matter composition with biochar amendment in a temperate forest soil.  
645 *Soil Biology and Biochemistry* **81**:244–254.
- 646 Nickerson N, Egan J, Risk D. (2013). Iso-FD: A novel method for measuring the isotopic  
647 signature of surface flux. *Soil Biology and Biochemistry* **62**: 99–106.
- 648 Nielsen S, Minchin T, Kimber S, van Zwieten L, Gilbert J, Munroe P, *et al.* (2014). Comparative  
649 analysis of the microbial communities in agricultural soil amended with enhanced biochars or  
650 traditional fertilisers. *Agriculture, Ecosystems and Environment* **191**:73–82.
- 651 Oksanen J, Blanchet FG, Kindt R, Legendre P, Minchin PR, OHara RB, *et al.* (2015). vegan:  
652 Community Ecology Package. R package version 2.3-0. [http://CRAN.R-](http://CRAN.R-project.org/package=vegan)  
653 [project.org/package=vegan](http://CRAN.R-project.org/package=vegan).
- 654 Pascault N, Ranjard L, Kaisermann A, Bachar D, Christen R, Terrat S, *et al.* (2013). Stimulation  
655 of different functional groups of bacteria by various plant residues as a driver of soil priming  
656 effect. *Ecosystems* **16**:810–822.
- 657 Pfeiffer B, Fender A-C, Lasota S, Hertel D, Jungkunst HF, Daniel R. (2013). Leaf litter is the  
658 main driver for changes in bacterial community structures in the rhizosphere of ash and beech.  
659 *Applied Soil Ecology* **72**:150–160.
- 660 R Core Team (2015). R: A language and environment for statistical computing. R Foundation for  
661 Statistical Computing, Vienna, Austria. URL <http://www.R-project.org/>.

- 662 Rousk J, Bååth E, Brookes PC, Lauber CL, Lozupone C, Caporaso JG, *et al.* (2010). Soil  
663 bacterial and fungal communities across a pH gradient in an arable soil. *The ISME Journal*  
664 4:1340-1351.
- 665 Schloss PD, Westcott SL, Ryabin T, Hall JR, Hartmann M, Hollister EB, *et al.* (2009).  
666 Introducing mothur: Open-source, platform-independent, community-supported software for  
667 describing and comparing microbial communities. *Applied and Environmental Microbiology*  
668 75:7537–7541.
- 669 Shinnars KJ, Binversie BN. (2007). Fractional yield and moisture of corn stover biomass  
670 produced in the Northern US Corn Belt. *Biomass and Bioenergy* 31:576-584.
- 671 Slavich PG, Sinclair K, Morris SG, Kimber SWL, Downie A, Zwieten L. (2013). Contrasting  
672 effects of manure and green waste biochars on the properties of an acidic ferralsol and  
673 productivity of a subtropical pasture. *Plant and Soil* 366:213–227.
- 674 Taketani RG, Lima AB, Conceição Jesus E, Teixeira WG, Tiedje JM, Tsai SM. (2013). Bacterial  
675 community composition of anthropogenic biochar and Amazonian anthrosols assessed by 16S  
676 rRNA gene 454 pyrosequencing. *Antonie van Leeuwenhoek* 104:233–242.
- 677 van Es HM, Gomes CP, Sellmann M, van Es CL. (2007). Spatially-balanced complete block  
678 designs for field experiments. *Geoderma* 140:346–352.
- 679 Vishnivetskaya TA, Mosher JJ, Palumbo AV, Yang ZK, Podar M, Brown SD, *et al.* (2011).  
680 Mercury and Other Heavy Metals Influence Bacterial Community Structure in Contaminated  
681 Tennessee Streams. *Applied and Environmental Microbiology* 77:302–311.
- 682 Watzinger A, Feichtmair S, Kitzler B, Zehetner F, Kloss S, Wimmer B, *et al.* (2014). Soil  
683 microbial communities responded to biochar application in temperate soils and slowly  
684 metabolized <sup>13</sup>C-labelled biochar as revealed by <sup>13</sup>C PLFA analyses: results from a short-term  
685 incubation and pot experiment. *European Journal of Soil Science* 65:40–51.
- 686 Werth M, Kuzyakov Y. (2010). <sup>13</sup>C fractionation at the root-microorganisms-soil interface: A  
687 review and outlook for partitioning studies. *Soil Biology and Biochemistry* 42:1372–1384.
- 688 Whitman T, Enders A, Lehmann J. (2014). Pyrogenic carbon additions to soil counteract positive  
689 priming of soil carbon mineralization by plants. *Soil Biology and Biochemistry* 73:33–41.
- 690 Whitman T, Hanley K, Enders A, Lehmann J. (2013). Predicting pyrogenic organic matter  
691 mineralization from its initial properties and implications for carbon management. *Organic*  
692 *Geochemistry* 64:76–83.
- 693 Whitman T, Lehmann J. (2015). A dual-isotope approach to allow conclusive partitioning

- 694 between three sources. *Nature Communications* **6**:no.8708.
- 695 Whitman T, Singh BP, Zimmerman AR. (2015). Priming effects in biochar-amended soils:  
696 Implications of biochar-soil organic matter interactions for carbon storage. In:*Biochar for*  
697 *Environmental Management*, Lehmann, J & Joseph, S (eds). Routledge, NY.
- 698 Whitman T, Zhu Z, Lehmann J. (2014). Carbon mineralizability determines interactive effects on  
699 mineralization of pyrogenic organic matter and soil organic carbon. *Environmental Science &*  
700 *Technology* **48**:13727–13734.
- 701 Woolf D, Lehmann J. (2012). Modelling the long-term response to positive and negative priming  
702 of soil organic carbon by black carbon. *Biogeochemistry*, **111**: 83–95.
- 703 Xu H-J, Wang X-H, Li H, Yao H-Y, Su J-Q, Zhu Y-G. (2014). Biochar impacts soil microbial  
704 community composition and nitrogen cycling in an acidic soil planted with rape. *Environmental*  
705 *science & Technology* **48**:9391–9399.
- 706 Yarza P, Richter M, Peplies J, Euzéby J, Amann R, Schleifer K-H, *et al.* (2008). The All-Species  
707 Living Tree project: A 16S rRNA-based phylogenetic tree of all sequenced type strains.  
708 *Systematic and Applied Microbiology* **31**:241–250.
- 709 Zhang H, Sekiguchi Y, Hanada S, Hugenholtz P, Kim H, Kamagata Y, *et al.* (2003).  
710 *Gemmatimonas aurantiaca* gen. nov., sp nov., a gram-negative, aerobic, polyphosphate-  
711 accumulating micro-organism, the first cultured representative of the new bacterial phylum  
712 *Gemmatimonadetes* phyl. nov. *International Journal of Systematic and Evolutionary*  
713 *Microbiology* **53**:1155–1163.
- 714 Zimmerman AR. (2010). Abiotic and microbial oxidation of laboratory-produced black carbon  
715 (biochar). *Environmental Science & Technology* **44**:1295–1301.
- 716



717 **Figure legends**

718

719 **Figure 1** Mean CO<sub>2</sub> flux rates over time. Error bars  $\pm 1$  SE, n=8-16. Dotted line indicates plots  
720 that received fresh stover additions. Dashed orange line indicates plots that received PyOM  
721 additions. Solid yellow line indicates plots that had no additions. \* indicates significant  
722 differences between plots with PyOM additions and stover or no-addition plots, while ‡ indicates  
723 significant differences between plots that received fresh stover additions and PyOM or no-  
724 addition plots (mixed model repeated measures design, Tukey-adjusted post-hoc comparisons,  $p$   
725  $< 0.05$ ). X indicates days where microbial community was sampled. • indicates days where <sup>13</sup>CO<sub>2</sub>  
726 flux was partitioned between SOC and amendments.

727

728 **Figure 2** NMDS ordination (k=2, stress = 0.09) of weighted UniFrac distances between bacterial  
729 communities, showing differences across amendments for a given day (top row) and across days  
730 for a given amendment (bottom row).

731

732 **Figure 3** Relative abundance (unscaled by total microbial DNA) of top 12 phyla observed in the  
733 unamended, stover-amended, and PyOM-amended soils (n = 8-16). Values beyond 1.5 times the  
734 inter-quartile range are indicated (x), as are values that differ significantly from unamended (\*,  $t$ -  
735 test,  $p < 0.05$ , Bonferroni-corrected for 72 comparisons).

736



737 **Figure 4** Log<sub>2</sub>-fold change in relative abundance of OTUs as compared to unamended plots.  
738 Each circle represents a single OTU and dashed and dotted lines represent increases or decreases  
739 of 2x and 10x, respectively. Colours are scaled from yellow to red in decreasing *p*-value, with  
740 grey points indicating OTUs with BH-adjusted *p*-values > 0.10).

741

742 **Figure 5** Log<sub>2</sub>-fold change in relative abundance of OTUs in response to stover or PyOM as  
743 compared to unamended plots. Data are the same as those depicted in Figure 4. Note different  
744 scales on axes. Each point represents the response for a single OTU across replicates, colored by  
745 phylum. Dashed oval overlays indicate response groupings, where blue indicates strong stover  
746 responders, pink indicates strong PyOM responders, and purple indicates common responders.  
747 Grey histograms at the sides of the plot indicate density of OTU points.

748

749 **Figure 6** Log<sub>2</sub>-fold change of the relative abundance of OTUs in PyOM or stover plots vs. soil-  
750 only plots on days 12 and 82, for *Firmicutes*, *Gemmatimonadetes*, and *Verrucomicrobia* phyla.  
751 Each point represents the response for a single OTU across replicates, coloured by order. Circles  
752 represent day 12 and triangles represent day 82. Square brackets indicate candidate order in  
753 Greengenes taxonomic nomenclature.

754

755

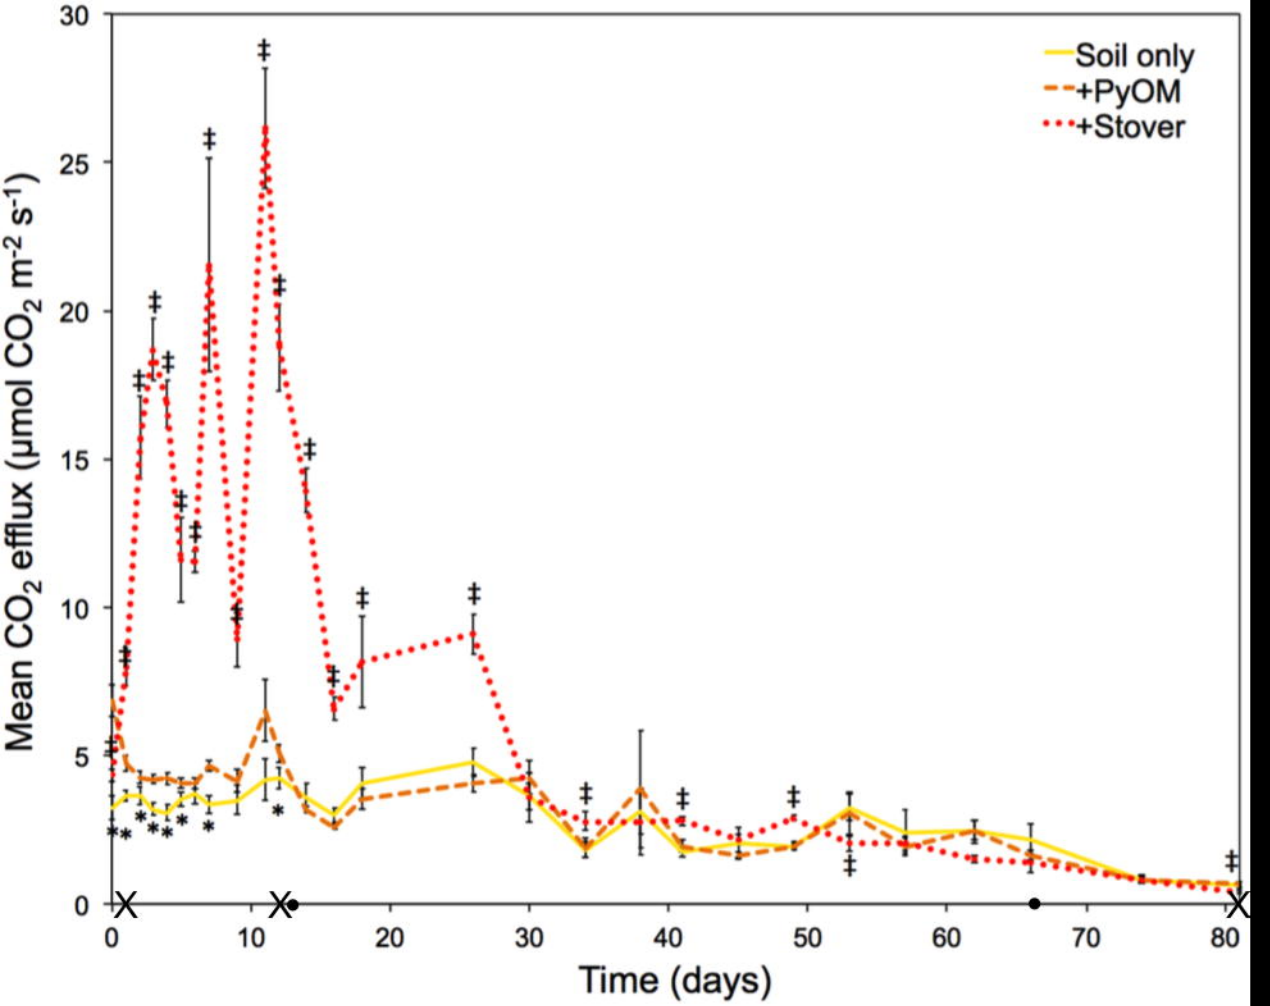

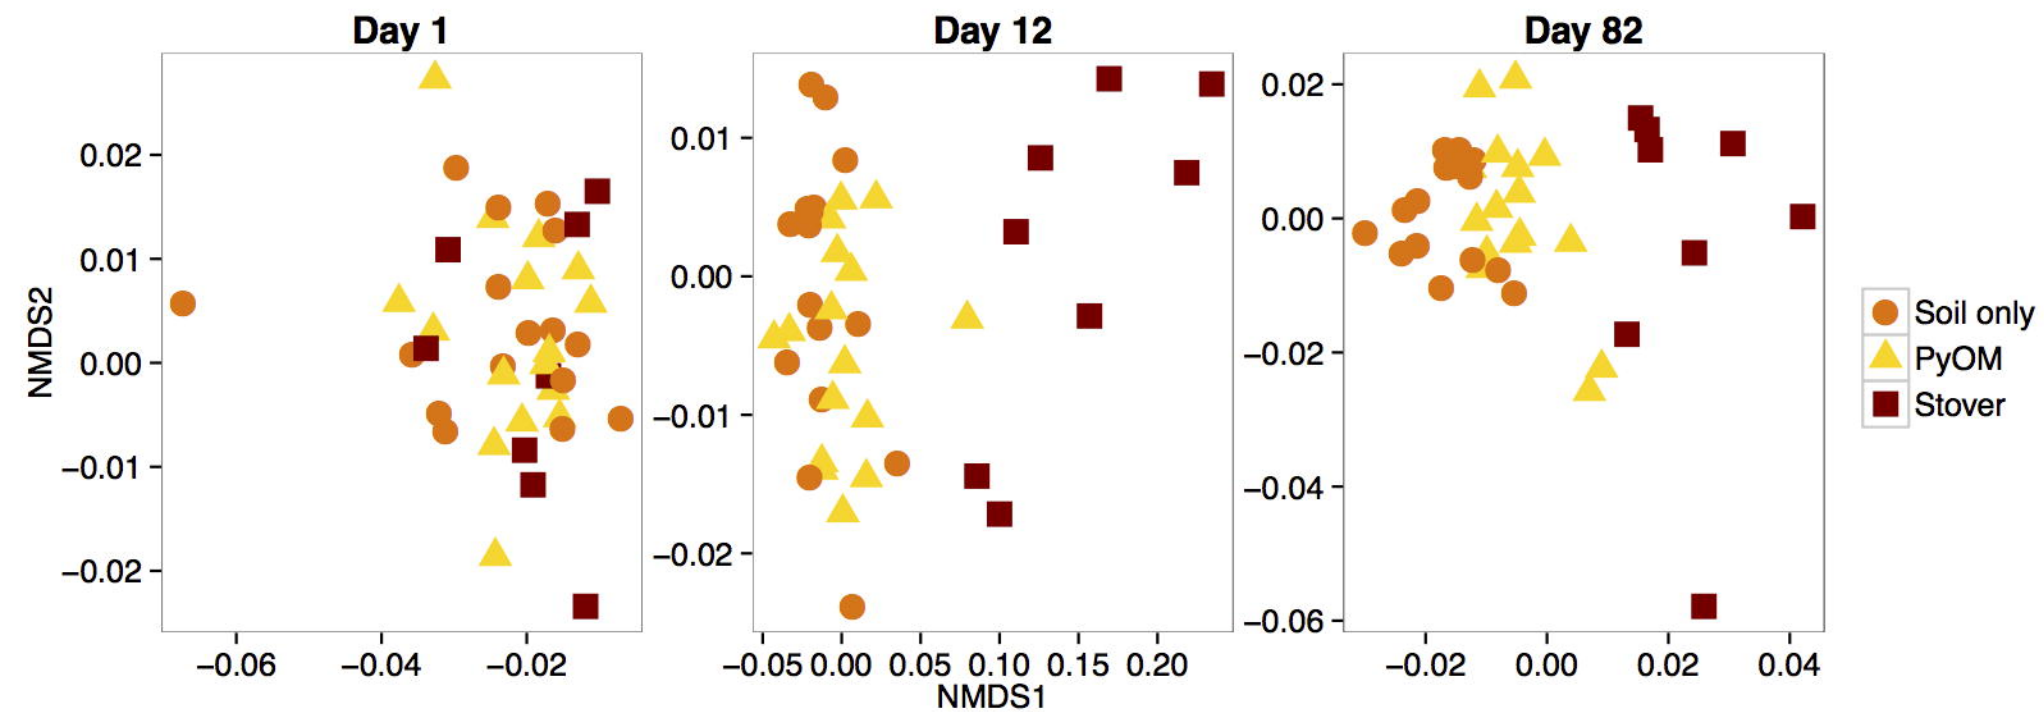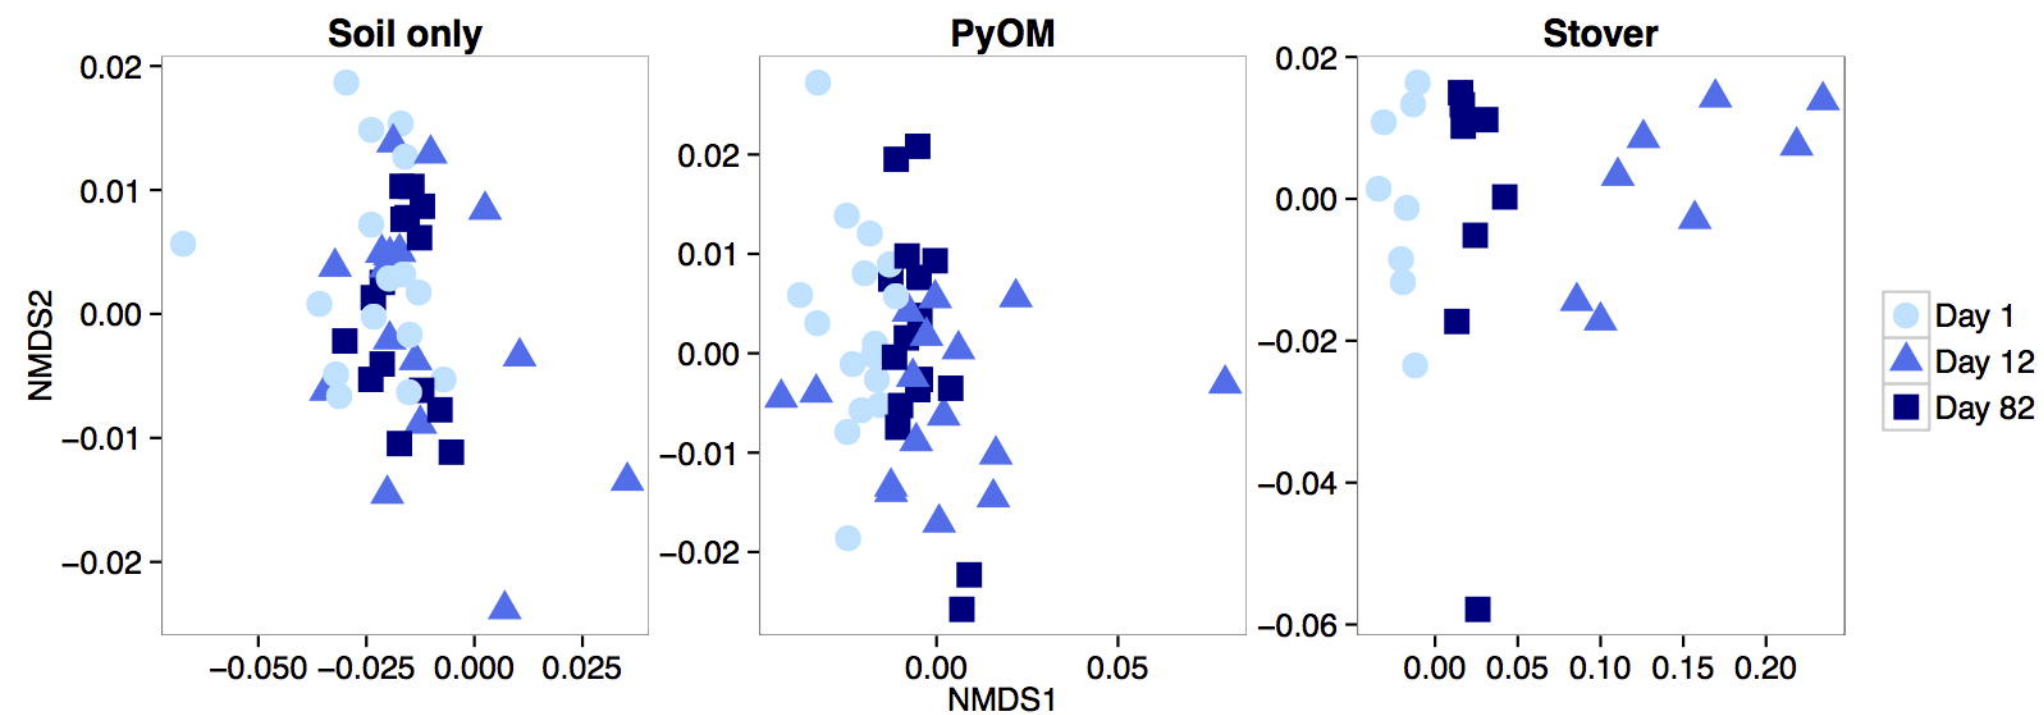

Relative abundance

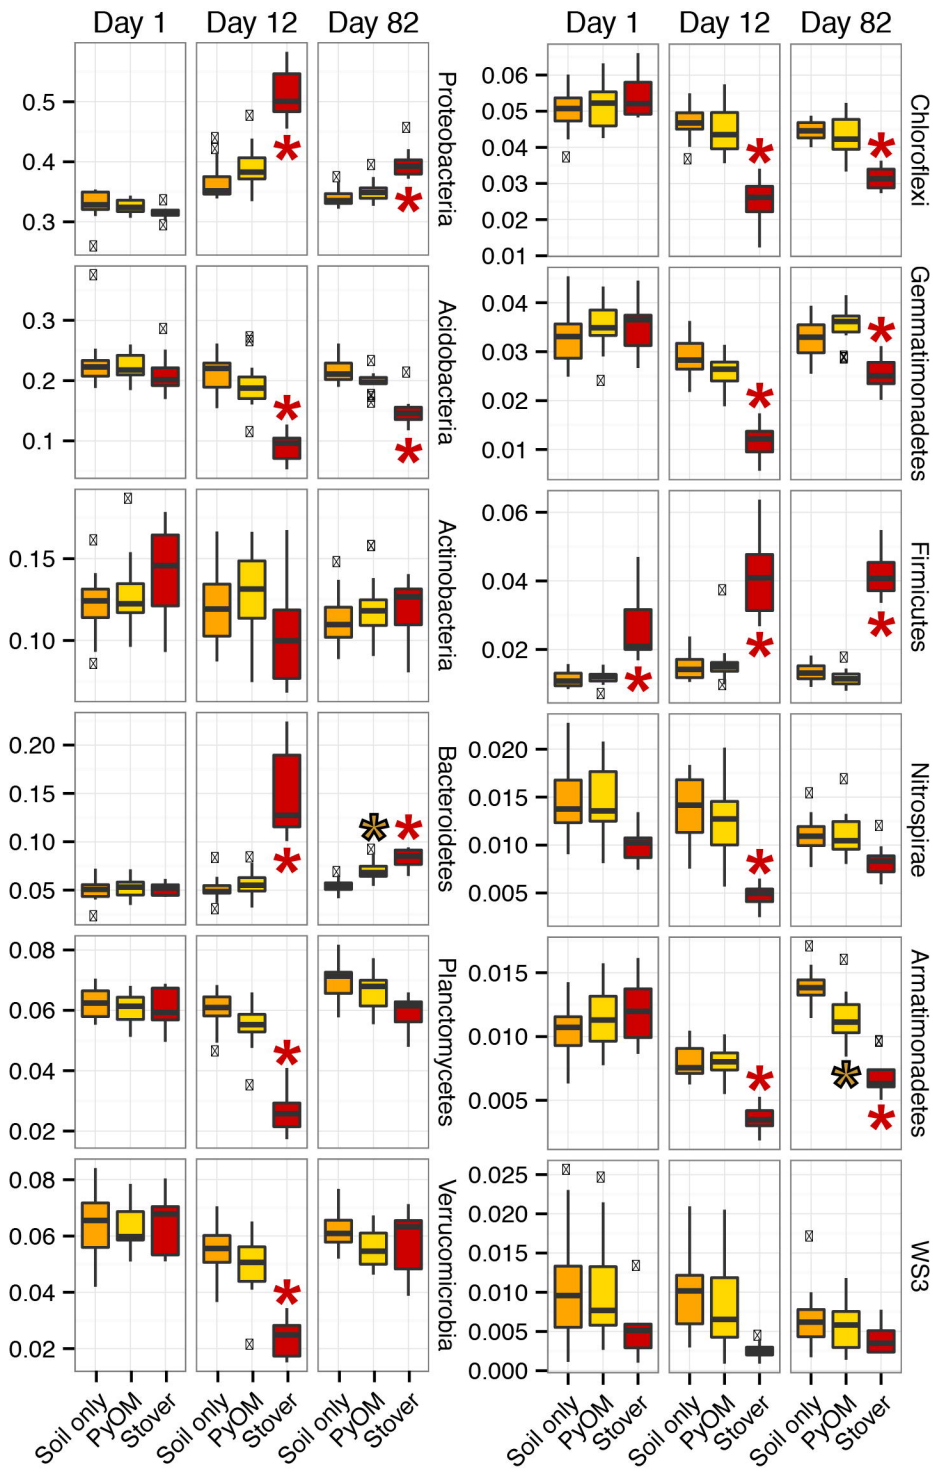

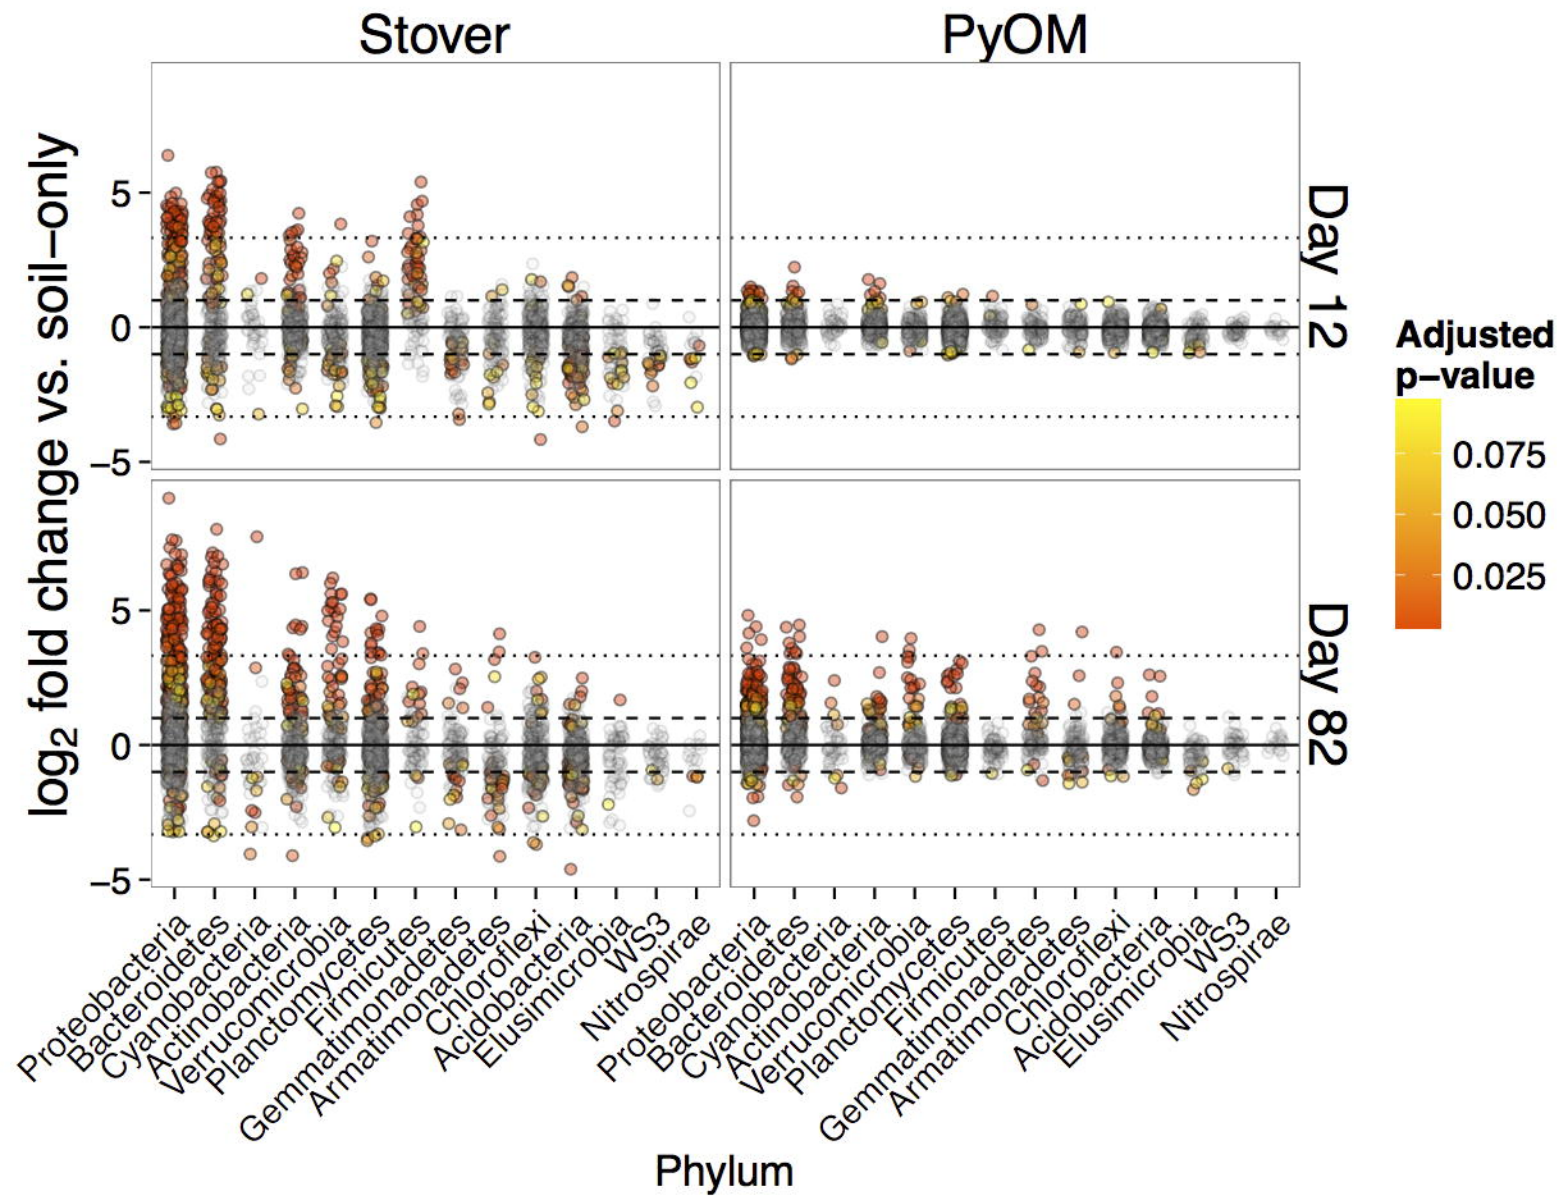



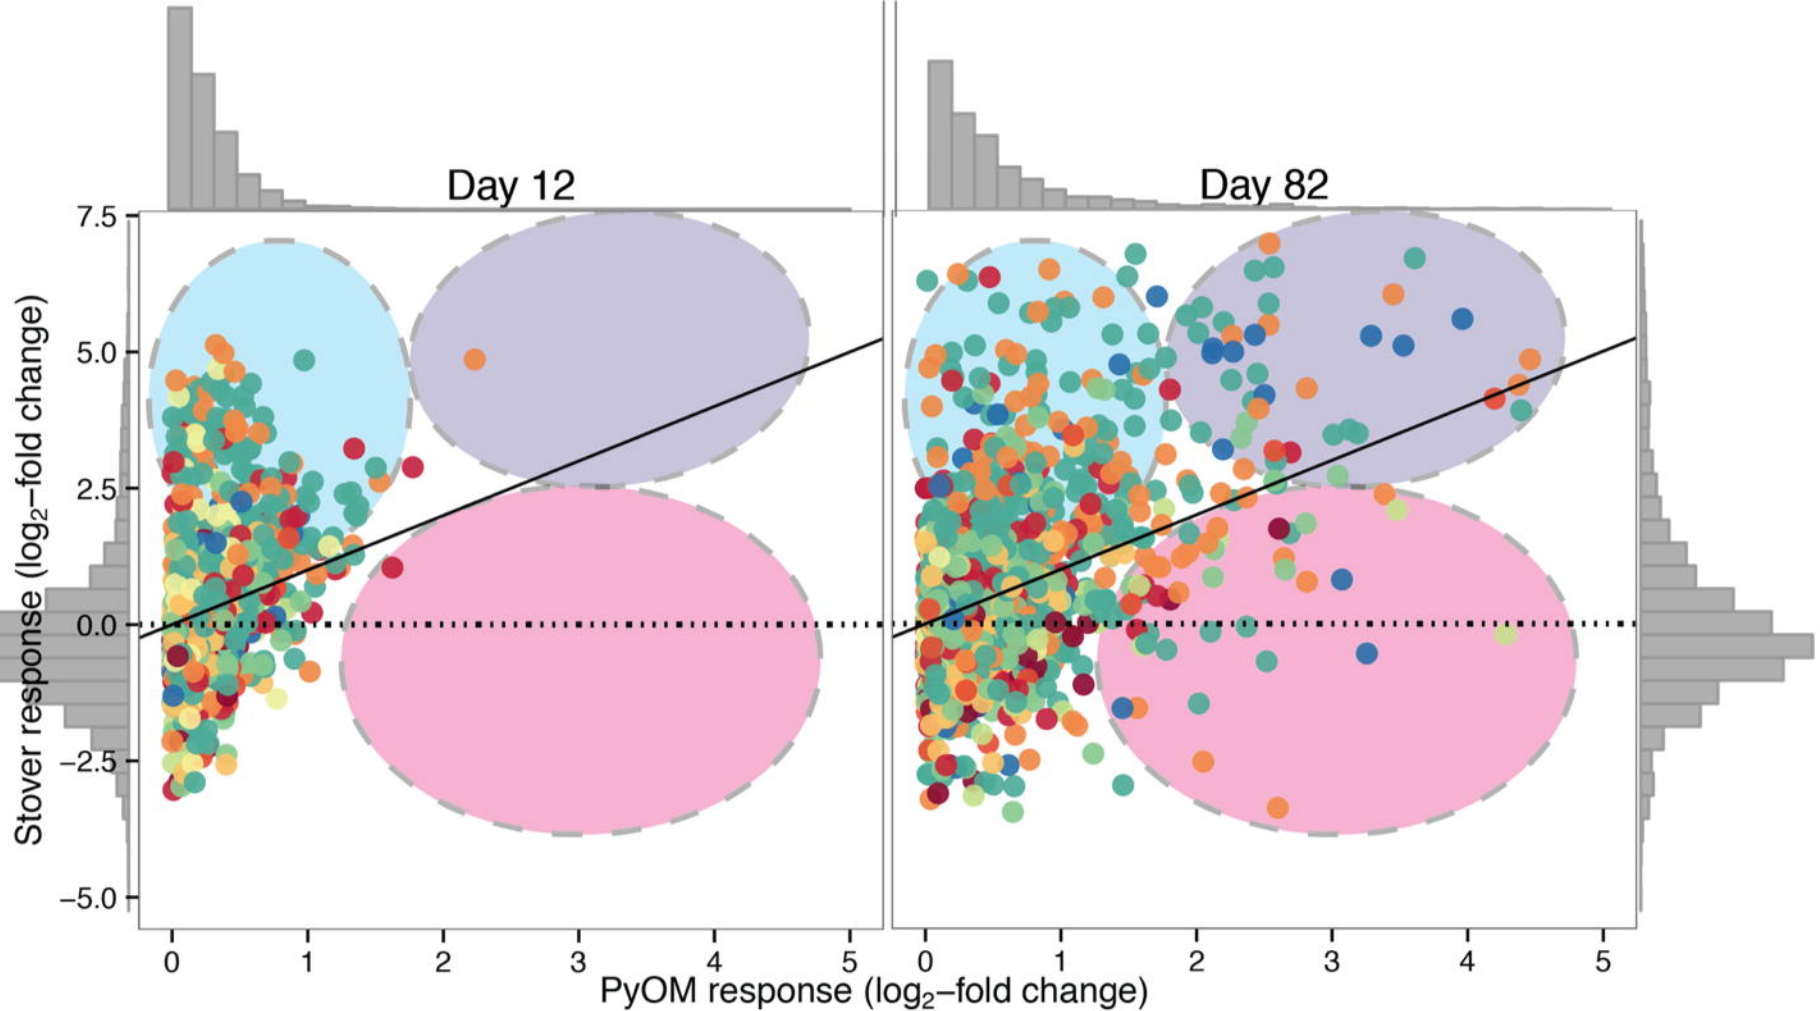

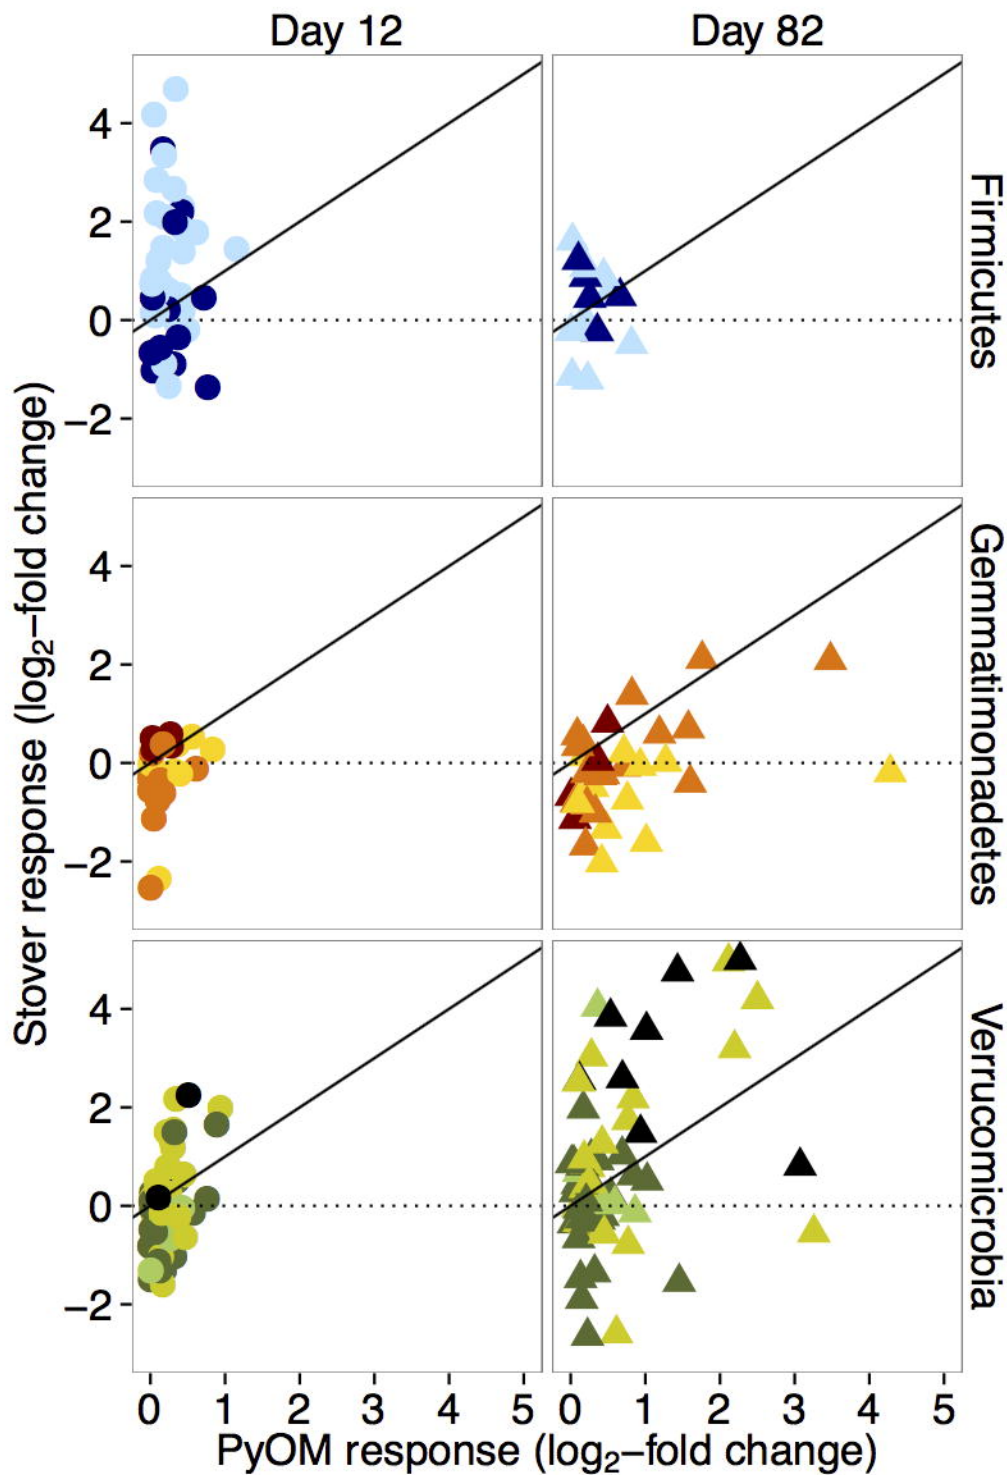

### Order

- Bacillales
- Clostridiales
- Ellin5290
- Gemmatimonadales
- N1423WL
- [Chthoniobacterales]
- Opitutales
- [Pedosphaerales]
- Verrucomicrobiales

### Days since addition

- Day 12
- ▲ Day 82
